# Supplementary material
Source: PubMed Central journal article supplement (PMC6075534)
Supplement: btx784_supplementary.pdf [file btx784_supplementary.pdf]

# Supplementary Material: Sequential Feature Selection and Inference using Multivariate Random Forests

Joshua Mayer, Raziur Rahman, Souparno Ghosh and Ranadip Pal

## Simulation

Both MLASSO and MEnet produce weights that reflect importance/relevance of the associated covariates. However, reliability of these weights completely depend upon correct model specification. If the model is misspecified the weights are not reliable indicators of variable importance. We offer a simple simulation study below to illustrate our point.

We generate the feature matrix,  $\mathbf{X}$ , independently from  $\mathcal{N}(0, 1)$  and use 3 *signals* and 997 *spurious* features ( $m = 0.003M$ ). Marginally, both responses share the same set of features as follows:

$$Y_j = 3X_1 + 2X_1^2 + 4X_2 + 3X_2^2 + 8X_3 + \epsilon, \quad j = 1, 2$$

where  $\epsilon \sim \mathcal{N}(0, 1)$ . Dependence between  $Y_1$  and  $Y_2$  are induced by a Gumbel copula with  $\nu = 2$ .

We allow  $n_{train} = 400$  and  $n_{test} = 100$  for each of five folds and for SMuRFS, we fix  $q = 5$  and  $\alpha = 0.05$ . The training set is again evenly splitted into a *secondary training* set and a *secondary test* set. We select variables on the *secondary training* set and build the predictive random forest on the *secondary test* set. We then compute the prediction error on the *primary test*. Table 1 shows the selection accuracy of competing algorithms.

All the algorithms correctly identify the *signals*. Next, we check whether estimates of regression coefficients obtained from MLASSO and MEnet correctly identified the variable importance in Table 2. Note that, the regularization algorithms need a pre-specified feature matrix. If one suspects polynomial functions of features are important, one needs to include those polynomials manually. Consider the simulation example we offer in the main manuscript where the right hand side of the data generating model has a linear component and a logistic component. How many polynomial terms need to be included in that case? In general, when dealing with huge feature set, expanding the feature matrix to accommodate polynomial terms increases computational burden considerably. Such polynomial terms are not customarily included in standard regularization methods. We also have not included the quadratic terms when fitting MLASSO and MEnet in this simulation. Admittedly, we are fitting a misspecified model, but then again, in real data it is almost impossible to rule out model misspecification. Regardless of the misspecification both MLASSO and MEnet correctly identified the *signals*!

Observe that, in some folds, both MLASSO and MEnet correctly identify variable importance only for the linear terms ( $X_3$  dominates both  $X_1$  and  $X_2$  only in the linear terms). The presence of the quadratic terms of  $X_1$  and  $X_2$  leads to misidentification in couple of folds. Furthermore, the spurious features appearing for MLASSO and MEnet in Table 1 imply the existence of several non-zero  $\beta$  associate with spurious features. Ordering of these spurious features is meaningless. Although, we do observe

Table 1: Table showing the selection accuracy of competing algorithms

| <b>Method</b> | <b>Fold</b> | <b>Number of true signal</b> | <b>Number of signals identified</b> | <b>Number of spurious features selected</b> |
|---------------|-------------|------------------------------|-------------------------------------|---------------------------------------------|
| SMuRFS        | Fold 1      | 3                            | 3                                   | 0                                           |
|               | Fold 2      | 3                            | 3                                   | 2                                           |
|               | Fold 3      | 3                            | 3                                   | 0                                           |
|               | Fold 4      | 3                            | 3                                   | 1                                           |
|               | Fold 5      | 3                            | 3                                   | 0                                           |
| MLASSO        | Fold 1      | 3                            | 3                                   | 26                                          |
|               | Fold 2      | 3                            | 3                                   | 7                                           |
|               | Fold 3      | 3                            | 3                                   | 21                                          |
|               | Fold 4      | 3                            | 3                                   | 12                                          |
|               | Fold 5      | 3                            | 3                                   | 33                                          |
| MEnet         | Fold 1      | 3                            | 3                                   | 216                                         |
|               | Fold 2      | 3                            | 3                                   | 139                                         |
|               | Fold 3      | 3                            | 3                                   | 191                                         |
|               | Fold 4      | 3                            | 3                                   | 112                                         |
|               | Fold 5      | 3                            | 3                                   | 335                                         |

that, across all the folds, weights of the spurious features are smaller than the weights associated with  $X_1, X_2$  and  $X_3$  (last column of Table 2). Regardless, it seems that weights estimated from MLASSO and MEnet may give a distorted picture of relative importance and relevance of features under model misspecification. This demonstration suggests that both MLASSO and MEnet are more robust in terms of identifying important features as compared to ranking features.

Instead, we contend that it is safer to label the features as statistically significant or not.

Finally, we use the secondary test set to generate the predictive multivariate conditional RF. The predictive performances in the primary test sets (across the folds) are shown in Table 3.

Table 2: Table showing the Rank Ordering ability of MLASSO and MEnet for the synthetic data. In each case,  $\beta_i$  is the estimated regression coefficient associated with  $X_i$ .

| <b>Method</b> | <b>Fold</b> | <b>Response</b> | $\beta_1$ | $\beta_2$ | $\beta_3$ | $\max  \beta_j _{j=4}^{1000}$ |      |
|---------------|-------------|-----------------|-----------|-----------|-----------|-------------------------------|------|
| MLASSO        | Fold 1      | $Y_1$           | 2.25      | 4.11      | 6.48      | 0.56                          |      |
|               |             | $Y_2$           | 2.25      | 4.08      | 6.45      | 0.57                          |      |
|               | Fold 2      | $Y_1$           | 3.03      | 2.26      | 6.06      | 0.42                          |      |
|               |             | $Y_2$           | 3.01      | 2.25      | 6.09      | 0.43                          |      |
|               | Fold 3      | $Y_1$           | 2.59      | 1.50      | 5.61      | 1.20                          |      |
|               |             | $Y_2$           | 2.58      | 1.53      | 5.67      | 1.21                          |      |
|               | Fold 4      | $Y_1$           | 3.65      | 3.60      | 6.44      | 0.41                          |      |
|               |             | $Y_2$           | 3.60      | 3.66      | 6.42      | 0.42                          |      |
|               | Fold 5      | $Y_1$           | 3.75      | 3.56      | 6.16      | 1.11                          |      |
|               |             | $Y_2$           | 3.73      | 3.55      | 6.19      | 1.08                          |      |
|               | Enet        | Fold 1          | $Y_1$     | 1.30      | 1.86      | 2.94                          | 0.72 |
|               |             |                 | $Y_2$     | 1.31      | 1.84      | 2.93                          | 0.70 |
|               |             | Fold 2          | $Y_1$     | 1.60      | 1.03      | 2.74                          | 0.61 |
|               |             |                 | $Y_2$     | 1.59      | 1.02      | 2.76                          | 0.62 |
|               |             | Fold 3          | $Y_1$     | 1.35      | 0.75      | 2.35                          | 0.57 |
| $Y_2$         |             |                 | 1.34      | 0.77      | 2.38      | 0.57                          |      |
| Fold 4        |             | $Y_1$           | 1.70      | 1.54      | 2.62      | 0.48                          |      |
|               |             | $Y_2$           | 1.67      | 1.55      | 2.62      | 0.48                          |      |
| Fold 5        |             | $Y_1$           | 2.18      | 1.64      | 3.32      | 1.13                          |      |
|               |             | $Y_2$           | 2.14      | 1.65      | 3.34      | 1.11                          |      |

Table 3: Prediction performance on the test set for training full

| <b>Method</b> | <b>Variable</b> | <b>NMSPE</b> | <b>NMAPE</b> |
|---------------|-----------------|--------------|--------------|
| SMuRFS        | $Y_1$           | 0.2464       | 0.3180       |
|               | $Y_2$           | 0.3070       | 0.3476       |
| MLASSO        | $Y_1$           | 0.4300       | 0.4684       |
|               | $Y_2$           | 0.4730       | 0.4793       |
| MEnet         | $Y_1$           | 0.7419       | 0.6480       |
|               | $Y_2$           | 0.7642       | 0.6471       |

## Results on drug pairs $S_{C1}$ and $S_{C2}$

Table 4: Enrichment analysis for SMuRFS, *strong*-SMuRFS strong, MLASSO and MEnet methods for whole genome statistical background with 0.4 confidence interval for drug pairs  $S_{C1}$  and  $S_{C2}$  obtained from GDSC dataset

| Method                              | SMuRFS | <i>strong</i> -SMuRFS | MLASSO  | MEnet   |
|-------------------------------------|--------|-----------------------|---------|---------|
| AZD-0530 & Erlotinib                |        |                       |         |         |
| Feature size                        | 791    | 235                   | 171     | 172     |
| Number of Nodes                     | 607    | 180                   | 151     | 153     |
| Number of edges                     | 2111   | 220                   | 108     | 113     |
| Average node degree                 | 6.96   | 2.44                  | 1.43    | 1.48    |
| Avg Local clustering coeff          | 0.438  | 0.363                 | 0.264   | 0.269   |
| Expected Number of Edges            | 1368   | 110                   | 66      | 70      |
| PPI enrichment p-value              | 0      | 0                     | 1.19e-6 | 1.32e-6 |
| Ratio of Observed to expected edges | 1.54   | <b>2</b>              | 1.63    | 1.61    |
| Pathway Gene Count                  | 6      | 3                     | 0       | 0       |
| AZD6244 & PD-0325901                |        |                       |         |         |
| Feature size                        | 1825   | 214                   | 222     | 227     |
| Number of Nodes                     | 1301   | 181                   | 202     | 207     |
| Number of edges                     | 10832  | 238                   | 155     | 163     |
| Average node degree                 | 16.7   | 2.63                  | 1.53    | 1.57    |
| Avg Local clustering coeff          | 0.333  | 0.361                 | 0.317   | 0.324   |
| Expected Number of Edges            | 7022   | 127                   | 116     | 122     |
| PPI enrichment p-value              | 0      | 0                     | 2.73e-4 | 2.38e-4 |
| Ratio of Observed to expected edges | 1.54   | <b>1.87</b>           | 1.33    | 1.33    |
| Pathway Gene Count                  | 30     | 7                     | 4       | 1       |
| Nutlin-3a & PD-0332991              |        |                       |         |         |
| Feature size                        | 837    | 222                   | 431     | 439     |
| Number of Nodes                     | 657    | 176                   | 374     | 381     |
| Number of edges                     | 2287   | 265                   | 512     | 539     |
| Average node degree                 | 6.96   | 3.01                  | 2.74    | 2.83    |
| Avg Local clustering coeff          | 0.35   | 0.362                 | 0.337   | 0.332   |
| Expected Number of Edges            | 1733   | 160                   | 426     | 451     |
| PPI enrichment p-value              | 0      | 2.29e-14              | 3.8e-5  | 2.9e-5  |
| Ratio of Observed to expected edges | 1.32   | <b>1.65</b>           | 1.2     | 1.2     |
| Pathway Gene Count                  | 14     | 11                    | 8       | 8       |

Table 5: Prediction performances of competing methods for drug set  $S_{C1}$ 

| Drug Name        | Fold | Feature Selection<br>Algorithm | Number of<br>Features | NMSPE         | NMAPE         |
|------------------|------|--------------------------------|-----------------------|---------------|---------------|
| <i>AZD-0530</i>  | 1    | <i>strong</i> -SMuRFS          | 8                     | <b>1.0239</b> | <b>0.8274</b> |
|                  |      | SMuRFS                         | 279                   | 1.0652        | 0.8568        |
|                  |      | MLASSO                         | 25                    | 1.3220        | 0.8793        |
|                  |      | MEnet                          | 26                    | 1.1345        | 0.8769        |
|                  | 2    | <i>strong</i> -SMuRFS          | 82                    | <b>1.0070</b> | <b>0.6666</b> |
|                  |      | SMuRFS                         | 240                   | 1.0145        | 0.6677        |
|                  |      | MLASSO                         | 108                   | 1.0421        | 0.6761        |
|                  |      | MEnet                          | 108                   | 1.0332        | 0.6725        |
|                  | 3    | <i>strong</i> -SMuRFS          | 118                   | 1.0197        | 0.5597        |
|                  |      | SMuRFS                         | 349                   | <b>1.0011</b> | 0.5579        |
|                  |      | MLASSO                         | 32                    | 1.0084        | 0.5539        |
|                  |      | MEnet                          | 32                    | 1.0115        | <b>0.5528</b> |
|                  | 4    | <i>strong</i> -SMuRFS          | 78                    | 0.9984        | 0.6516        |
|                  |      | SMuRFS                         | 317                   | 0.9929        | <b>0.6512</b> |
|                  |      | MLASSO                         | 15                    | <b>0.9204</b> | 0.6658        |
|                  |      | MEnet                          | 15                    | 0.9217        | 0.6628        |
|                  | 5    | <i>strong</i> -SMuRFS          | 78                    | 0.9031        | 0.5894        |
|                  |      | SMuRFS                         | 279                   | <b>0.8906</b> | <b>0.5850</b> |
|                  |      | MLASSO                         | 9                     | 0.9375        | 0.6123        |
|                  |      | MEnet                          | 9                     | 0.9308        | 0.6123        |
| <i>Erlotinib</i> | 1    | <i>strong</i> -SMuRFS          | 8                     | 0.8293        | <b>0.6472</b> |
|                  |      | SMuRFS                         | 17                    | <b>0.8124</b> | 0.6737        |
|                  |      | MLASSO                         | 25                    | 0.8892        | 0.7705        |
|                  |      | MEnet                          | 25                    | 0.8986        | 0.7773        |
|                  | 2    | <i>strong</i> -SMuRFS          | 82                    | <b>0.7769</b> | <b>0.5658</b> |
|                  |      | SMuRFS                         | 240                   | 0.7927        | 0.5764        |
|                  |      | MLASSO                         | 108                   | 0.8831        | 0.5863        |
|                  |      | MEnet                          | 108                   | 0.8811        | 0.5927        |
|                  | 3    | <i>strong</i> -SMuRFS          | 118                   | 0.8935        | 0.6567        |
|                  |      | SMuRFS                         | 349                   | 0.8643        | <b>0.6497</b> |
|                  |      | MLASSO                         | 32                    | <b>0.8507</b> | 0.6644        |
|                  |      | MEnet                          | 32                    | 0.8685        | 0.6672        |
|                  | 4    | <i>strong</i> -SMuRFS          | 78                    | <b>0.8181</b> | <b>0.6365</b> |
|                  |      | SMuRFS                         | 317                   | 0.8479        | 0.6409        |
|                  |      | MLASSO                         | 15                    | 0.8728        | 0.6614        |
|                  |      | MEnet                          | 15                    | 0.8785        | 0.6648        |
|                  | 5    | <i>strong</i> -SMuRFS          | 78                    | 0.8434        | 0.5193        |
|                  |      | SMuRFS                         | 279                   | <b>0.8423</b> | <b>0.5181</b> |
|                  |      | MLASSO                         | 9                     | 0.8718        | 0.5264        |
|                  |      | MEnet                          | 9                     | 0.8640        | 0.5285        |

Table 6: Prediction performances of competing methods for drug set  $S_{C_2}$ 

| Drug Name | Fold | Feature Selection Algorithm | Number of Features | NMSPE         | NMAPE         |
|-----------|------|-----------------------------|--------------------|---------------|---------------|
| AZD-6244  | 1    | <i>strong</i> -SMuRFS       | 92                 | <b>0.8298</b> | <b>0.6162</b> |
|           |      | SMuRFS                      | 1308               | 0.8429        | 6188          |
|           |      | MLASSO                      | 75                 | 0.8390        | 0.6250        |
|           |      | MEnet                       | 76                 | 0.8390        | 0.6250        |
|           | 2    | <i>strong</i> -SMuRFS       | 55                 | <b>0.8444</b> | <b>0.6242</b> |
|           |      | SMuRFS                      | 279                | 0.8983        | 0.7121        |
|           |      | MLASSO                      | 34                 | 0.8813        | 0.7039        |
|           |      | MEnet                       | 32                 | 0.8835        | 0.7071        |
|           | 3    | <i>strong</i> -SMuRFS       | 64                 | <b>0.7822</b> | <b>0.7148</b> |
|           |      | SMuRFS                      | 529                | 0.7953        | 0.7241        |
|           |      | MLASSO                      | 41                 | 0.8196        | 0.7473        |
|           |      | MEnet                       | 43                 | 0.8223        | 0.7486        |
|           | 4    | <i>strong</i> -SMuRFS       | 27                 | 0.8200        | 0.6688        |
|           |      | SMuRFS                      | 92                 | <b>0.8061</b> | <b>0.6672</b> |
|           |      | MLASSO                      | 71                 | 0.8574        | 0.7078        |
|           |      | MEnet                       | 71                 | 0.8504        | 0.7046        |
|           | 5    | <i>strong</i> -SMuRFS       | 81                 | <b>0.8665</b> | <b>0.6798</b> |
|           |      | SMuRFS                      | 669                | 0.8711        | 0.6832        |
|           |      | MLASSO                      | 48                 | 0.8909        | 0.6870        |
|           |      | MEnet                       | 50                 | 0.8928        | 0.6848        |
| PD-305901 | 1    | <i>strong</i> -SMuRFS       | 92                 | <b>0.7668</b> | <b>0.6623</b> |
|           |      | SMuRFS                      | 1308               | 0.7849        | 0.6747        |
|           |      | MLASSO                      | 75                 | 0.8104        | 0.6803        |
|           |      | MEnet                       | 76                 | 0.8174        | 0.6840        |
|           | 2    | <i>strong</i> -SMuRFS       | 55                 | 0.7261        | <b>0.6410</b> |
|           |      | SMuRFS                      | 279                | <b>0.7227</b> | 0.6485        |
|           |      | MLASSO                      | 34                 | 0.7501        | 0.6612        |
|           |      | MEnet                       | 32                 | 0.7534        | 0.6651        |
|           | 3    | <i>strong</i> -SMuRFS       | 64                 | 0.8530        | <b>0.5916</b> |
|           |      | SMuRFS                      | 529                | 0.8524        | 0.5960        |
|           |      | MLASSO                      | 41                 | <b>0.8438</b> | 0.6209        |
|           |      | MEnet                       | 43                 | 0.8469        | 0.6205        |
|           | 4    | <i>strong</i> -SMuRFS       | 27                 | 0.6788        | 0.6344        |
|           |      | SMuRFS                      | 92                 | <b>0.6751</b> | <b>0.6322</b> |
|           |      | MLASSO                      | 71                 | 0.6804        | 0.6406        |
|           |      | MEnet                       | 71                 | 0.6834        | 0.6415        |
|           | 5    | <i>strong</i> -SMuRFS       | 81                 | <b>0.7867</b> | <b>0.6699</b> |
|           |      | SMuRFS                      | 669                | 0.7919        | 0.6741        |
|           |      | MLASSO                      | 48                 | 0.8208        | 0.6905        |
|           |      | MEnet                       | 50                 | 0.8210        | 0.6906        |

## Pseudocode for SMuRFS algorithm

```
Inputs: ntree, mtry, alpha, prop.test, data
For i = 1:ntree
{
  select mtry covariates without replacement from remaining covariates
  select a bootstrp sample of size n_data from the data
  grow a conditional inference tree using mtry covariates
  find the minimum p-value among the covariates across all nodes
  select the covariates with Bonferroni corrected p-values > alpha
  from training data obtain a sample of size prop.test * n_data without replacement
  conduct a permutation test for each of the selected covariate
  delete the covariates with Bonferroni corrected p-value > alpha
}
return(remaining covariates)
```
